# A Study Using Ifosfamide and Etoposide in Patients with Cisplatin-refractory Recurrent or Metastatic Head and Neck Squamous Cell Carcinoma

Yu-Chung Huang<sup>1,2</sup>, Peter Mu-Hsin Chang<sup>1,2</sup>, Ming-Huang Chen<sup>1,2</sup>, Pen-Yuan Chu<sup>1,3</sup>, Cheng-Hwai Tzeng<sup>1,2</sup>, Shyue-Yih Chang<sup>1,3</sup> and Muh-Hwa Yang<sup>4,3,\*</sup>

<sup>1</sup>Faculty of Medicine, School of Medicine, <sup>2</sup>Division of Hematology and Oncology, Department of Medicine, <sup>3</sup>Department of Otolaryngology, Taipei Veterans General Hospital and <sup>4</sup>Institute of Clinical Medicine, National Yang-Ming University, Taipei, Taiwan

\*For reprints and all correspondence: Muh-Hwa Yang, Institute of Clinical Medicine, National Yang-Ming University, No.155, Sec. 2, Li-Nong Street, Peitou, Taipei 112, Taiwan. E-mail: mhyang2@vghtpe.gov.tw

Received November 22, 2010; accepted January 12, 2011

**Objective:** To investigate the efficacy and safety of combination therapy with ifosfamide and etoposide in cisplatin-refractory recurrent/metastatic squamous cell carcinoma of the head and neck.

**Methods:** Thirty patients with cisplatin-refractory recurrent/metastatic squamous cell carcinoma of the head and neck were treated with ifosfamide (1000 mg/m<sup>2</sup>/day) as a continuous 24 h infusion for 3 days and etoposide (100 mg/m<sup>2</sup>/day) as a bolus 1 h infusion on the same 3 days. The treatment was repeated every 4 weeks until disease progression.

**Results:** The overall rate of response was 27% (8/30), and 20% (6/30) of the patients achieved stable disease status. Median overall survival was 7.7 months. Subgroup analysis demonstrated significant improvement in overall survival in the group that achieved control of disease. Thirteen (43.3%) patients developed grade 3–4 neutropenia, and five (16.6%) developed grade 3–4 non-hematologic mucositis.

**Conclusions:** This combination chemotherapy had an effective and safe profile and improved survival in patients with cisplatin-refractory recurrent/metastatic squamous cell carcinoma of the head and neck who achieved disease control.

*Key words:* squamous cell carcinoma – head and neck cancer – ifosfamide – etoposide – metastatic – recurrent – cisplatin-refractory

## INTRODUCTION

Head and neck cancer comprises malignancies arising from the oral cavity, oropharynx, larynx and hypopharynx. It is the sixth leading cause of cancer-related deaths worldwide. The vast majority of head and neck cancers are squamous cell carcinomas. Multi-modal treatment is the mainstay for advanced stages of squamous cell carcinoma of the head and neck (SCCHN). Despite improved treatments and better locoregional control, many patients still suffer a relapse of the disease, and the prognosis of patients with R/M SCCHN is generally poor. The median overall survival (OS) is ~6–9 months (1,2). Cisplatin-based chemotherapy is the first-line treatment for R/M SCCHN. The combination of cisplatin

and 5-fluorouracil (5-FU) demonstrated a superior response rate, but at the price of much greater toxicity when compared with single agents (2–4). Unfortunately, no combination therapy has been shown to improve OS.

Recently, addition of the epidermal growth factor (EGFR) antagonist cetuximab to platinum-based chemotherapy has increased OS of patients with head and neck cancer by 20% and progression-free survival by 46% compared with the standard chemotherapy group (5). This was the first phase-III trial in more than a decade that showed a survival benefit for patients with R/M SCCHN. The drawback of cetuximab is the economic burden for patients, especially considering the lack of predictive markers for the response to cetuximab treatment

(other than formation of acne after 2–3 weeks of treatment). There is still no standard treatment for patients whose disease is resistant to cisplatin, and survival is generally short for those patients. Although there have been several trials to evaluate the survival benefit of cetuximab for patients with cisplatin-refractory SCCHN, the role of cetuximab is uncertain in this group of patients. In two phase-II trials, cetuximab monotherapy or combination with cisplatin has shown activity in patients with platinum-refractory R/M SCCHN (6,7). Further phase III studies are needed.

For these reasons, there is still a need to evaluate new therapeutic regimens for treating patients with cisplatin-refractory R/M SCCHN. The rationale for combining ifosfamide with etoposide is to overcome platinum-induced resistance. Platinum-based chemotherapy kills tumor cells by binding DNA strands. The enhancement of DNA repair pathways may contribute to tolerance to platinum-induced DNA damage. The combination of ifosfamide and etoposide (IE) provides an alkylating agent (ifosfamide), which damages the DNA of the cancer cells, and etoposide, which inhibits topoisomerase II, thus blocking the repair of DNA damage induced by the alkylating agent. Ifosfamide had been studied in R/M SCCHN with overall response rate of 26% (8). In addition, etoposide, either as monotherapy (9) or in combination with cisplatin plus mitomycin (10), also demonstrated clinical benefit in R/M SCCHN. The combined two-drug regimen has shown clinical benefit in cisplatin-resistant ovarian cancer (11,12) and in various types of cancers, including soft tissue sarcomas (13). Although the combination regimen of IE achieves encouraging efficacy in platinum-resistant ovarian cancer, significant toxicity occurs (11,12). We determined the dose of IE study according to previous reports (11–13). In previous trials, ifosfamide was given at a dose of 1–1.8 gm/m<sup>2</sup>/day for 5 days and the dosage of etoposide was 100 mg/m<sup>2</sup> for 3–10 days at intervals ranging from 3 to 4 weeks (11–13). Considering that our patients were heavily treated, we used a reduced dose of ifosfamide (1 g/m<sup>2</sup>) and etoposide (100 mg/m<sup>2</sup>) for three consecutive days in our treatment protocol compared with that in previous published studies. The reason for dose reduction was to avoid severe chemotherapy-related toxicities and the need of hematopoietic factor prophylaxis. The aim of this study was to find a regimen offering a manageable toxicity with a survival benefit in cisplatin-refractory R/M SCCHN. Therefore, the main objective of this study is to evaluate the efficacy and toxicity of this two-drug combination in heavily pretreated head and neck cancer patients.

## PATIENTS AND METHODS

### PATIENTS

#### PATIENT ELIGIBILITY

From September 2005 to January 2010, we prospectively evaluated patients with R/M SCCHN whose conditions were diagnosed in Taipei Veterans General Hospital, Taiwan, and

who failed first-line cisplatin-based chemotherapy. Informed consents before treatment were obtained. The study was reviewed and approved by our institutional review board. The eligibility criterion was the presence of metastatic or locoregional recurrent SCCHN (unresectable and unsuitable for re-irradiation). The inclusion criteria were radiologically assessable disease; Eastern Cooperative Oncology Group performance status (ECOG PS)  $\leq 2$ ; age 18 years or greater; ECOG PS of 2 or less; leukocyte count of at least  $3 \times 10^9$  cells<sup>-1</sup>; absolute neutrophil count of at least  $1.5 \times 10^9$  cells<sup>-1</sup>; platelet count of at least  $100 \times 10^9$  cells<sup>-1</sup>; prothrombin time: International Normalized ratio less than 1.5; total serum bilirubin level within normal limits; aspartate aminotransferase and alanine aminotransferase level of 2.5 times the upper limit of normal or less; and serum creatinine concentrations within normal limits. The exclusion criteria were brain metastasis proven by computed tomography (CT), significant comorbidities with major organ dysfunction and other malignancy except basal cell skin carcinoma or cervical carcinoma *in situ*.

#### TREATMENT SCHEDULE

Patients enrolled in this study were to receive 1000 mg/m<sup>2</sup> of ifosfamide given with mesna 1000 mg/m<sup>2</sup>/day for 3 days and 100 mg/m<sup>2</sup> of etoposide per day over the same 3 days (IE therapy). Chemotherapy was given on Days 1–3 of a 28 day schedule and continued until progression of disease, unacceptable toxicity or patient withdrawal occurred. All toxicities were graded according to the National Cancer Institute's Common Toxicity Criteria (version 3.0). Decisions regarding the use of granulocyte-stimulating factors were made on an individual patient basis at the discretion of the treating physician.

#### TREATMENT AND OUTCOME EVALUATION

Patients were evaluated by CT of the chest and abdomen and CT or magnetic resonance imaging of the neck at baseline. Before initiation of chemotherapy, patients were also evaluated with complete history and physical examination, recording of PS, complete blood cell count and serum biochemistries. Bone scans were performed at baseline and then as clinically indicated. Evaluation of tumor response was performed every 3 months by CT. Tumor response was defined according to the Response Evaluation Criteria in Solid Tumors criteria.

#### STATISTICAL METHODS

The Kaplan–Meier estimate was used for survival analysis, and the log-rank test was used for comparison of OS rates between groups. The response of each clinical factor was compared using the  $\chi^2$  test (for expected values  $>5$ ) or Fisher's exact test (for expected values  $\leq 5$ ) for categorical variables. The level of statistical significance was set at a two-sided *P* value  $<0.05$  for all tests. All statistical

analyses were made with SPSS version 16.0 (SPSS Inc., Chicago, IL, USA).

## RESULTS

### PATIENT CHARACTERISTICS

From September 2005 to January 2010, thirty-five consecutive cisplatin-refractory patients of head and neck cancers were treated with IE in Taipei Veterans General Hospital. Five cases with non-squamous cell histology were excluded (three small-cell carcinoma, one neuroendocrine carcinoma and one adenocystic carcinoma). Therefore, 30 patients (27 men, 3 women) were enrolled in the study. The median age of the patients was 51 years (range, 39–76 years). The patient characteristics are listed in Table 1. At initial diagnosis, the distribution of TNM (Tumor, Node, Metastasis) stages in our thirty cases is: II: 1, III: 2, IVa: 13, IVb: 6 and IVc (M1): 8.

The most common site of the primary tumor was the oropharynx (40%). The histology of 20 patients (66.7%) was moderately differentiated. The rest were well differentiated ( $n = 5$ , 16.7%) and poor differentiated ( $n = 5$ , 16.7%), respectively. The disease status of these cases when entering the IE trial is: distant metastasis (IVc): 14 locoregional recurrence: 16 (IVa: 11, IVb: 5). The median duration of disease from original diagnosis to study entry was 18.1 months. Fourteen cases had received surgery before this study (11 cases were undergone primary resection and three patients received salvage surgery for recurrent disease). All patients had previously received cisplatin alone or in combination with other agents; the most common combinations were cisplatin/FU ( $n = 27$ , 90%). Fourteen (46.6%) patients had received cisplatin/docetaxel. The median cycle of chemotherapy before IE therapy was four.

### TREATMENT ANALYSIS

All 30 patients received chemotherapy with IE, with a median of three cycles and a range of 1–6. There were no complete responses (CRs) to treatment. Eight (27%) patients had a partial response (PR), whereas six (20%) achieved stable disease (SD). Sixteen patients (53.3%) demonstrated disease progression. The overall rates of response and control of disease (defined as CR + PR + SD) were 27 and 47%, respectively. The only factor significantly associated with poor control of disease was cigarette smoking (Table 2).

### TOXICITY

Chemotherapy-related toxicities were graded according to the National Cancer Institute Common Toxicity Criteria, version 3.0 and are listed in Table 3. The major Grade 3 or 4 hematological toxicities were leucopenia (56.7%), neutropenia (43.3%) and anemia (16.6%). Febrile neutropenia occurred in five patients (20%). The most frequently

**Table 1.** Patient characteristics ( $n = 30$ )

|                                               | No (%)     |
|-----------------------------------------------|------------|
| Age (years): median (range)                   | 51 (39–76) |
| Sex                                           |            |
| Men                                           | 27 (90.0)  |
| Women                                         | 3 (10.0)   |
| Performance status                            |            |
| ECOG: 0/1/2                                   | 9/16/5     |
| Smoking                                       | 23 (76.7)  |
| BQ chewing                                    | 15 (50.0)  |
| Alcohol drinking                              | 17 (56.7)  |
| Primary site                                  |            |
| Oral cavity                                   | 7 (23.3)   |
| Oropharynx                                    | 12 (40.0)  |
| Hypopharynx                                   | 6 (20.0)   |
| Larynx                                        | 1 (3.3)    |
| Other <sup>a</sup>                            | 4 (13.3)   |
| Site of disease recurrence                    |            |
| Locoregional recurrence only                  | 16 (53.3)  |
| Distant metastasis                            | 14 (46.7)  |
| Previous initial therapy                      |            |
| Surgery                                       | 11 (36.7)  |
| Radiotherapy                                  | 22 (73.3)  |
| Chemotherapy <sup>b</sup>                     | 28 (93.3)  |
| Previous therapy for recurrence or metastasis |            |
| Systemic chemotherapy                         | 27 (90.0)  |
| Surgery                                       | 3 (10.0)   |
| Radiotherapy                                  | 8 (26.7)   |
| Previous platinum treatment                   |            |
| Cisplatin + 5-FU                              | 27 (90.0)  |
| Cisplatin + taxane                            | 14 (46.7)  |
| Other cisplatin-based regimen                 | 6 (20.0)   |
| Previous chemotherapy cycle                   |            |
| Median                                        | 4          |
| Range                                         | 2–12       |

ECOG, Eastern Cooperative Oncology Group; BQ, betel quid; 5-FU, 5-fluorouracil.

<sup>a</sup>Other: two esophagus, one nasopharynx, one occult primary.

<sup>b</sup>Including 6 systemic chemotherapy and 22 chemotherapy incorporated with radiotherapy.

observed severe non-hematologic toxicities were mucositis (16.6%) and nausea/vomiting (30%).

### UNIVARIATE ANALYSIS AND MULTIVARIATE ANALYSIS OF OS

The OS curve estimated by Kaplan–Meier analysis for the 30 patients is shown in Fig. 1. The median survival for all

**Table 2.** Baseline characteristics by status of disease control

|                                 | Without disease control<br><i>n</i> = 16(%) | Disease control group<br><i>n</i> = 14(%) | <i>P</i> |
|---------------------------------|---------------------------------------------|-------------------------------------------|----------|
| Age >60 year                    | 3 (18.8)                                    | 2 (14.3)                                  | 1.000    |
| Men                             | 15 (93.8)                                   | 12 (85.7)                                 | 0.586    |
| ECOG PS = 1–2                   | 13 (81.3)                                   | 7 (50.0)                                  | 0.122    |
| Locoregional recurrence only    | 8 (50.0)                                    | 8 (57.1)                                  | 0.980    |
| Primary site oropharynx         | 4 (25.0)                                    | 8 (57.1)                                  | 0.135    |
| Poorly differentiated histology | 3 (18.8)                                    | 2 (14.3)                                  | 1.000    |
| Previous surgery                | 9 (56.3)                                    | 5 (35.7)                                  | 0.448    |
| Smoking                         | 15 (93.8)                                   | 8(57.1)                                   | 0.031    |
| BQ chewing                      | 10( 62.5)                                   | 5 (35.7)                                  | 0.272    |
| Alcohol drinking                | 11 (68.8)                                   | 7 (50.0)                                  | 0.501    |

ECOG PS, Eastern Cooperative Oncology Group performance status.

**Table 3.** Toxicities (*n* = 30 patients)

|                       | Grade 1 (%) | Grade 2 (%) | Grade 3 (%) | Grade 4 (%) |
|-----------------------|-------------|-------------|-------------|-------------|
| Neutropenia           | 2 (6.7)     | 9 (30.0)    | 5 (16.6)    | 8 (26.7)    |
| Leukopenia            | 5 (16.6)    | 6 (20.0)    | 8 (26.7)    | 9 (30.0)    |
| Anemia                | 9 (30.0)    | 12 (40.0)   | 4 (13.3)    | 1 (3.3)     |
| Thrombocytopenia      | 7 (23.3)    | 4 (13.3)    | 2 (6.7)     | 1 (3.3)     |
| Febrile neutropenia   |             |             | 3 (10.0)    | 2 (6.7)     |
| Mucositis             | 8 (26.7)    | 8 (26.7)    | 5 (16.6)    | 2 (6.7)     |
| Nausea/vomiting       | 9 (30.0)    | 7 (23.3)    | 9 (30.0)    | 0           |
| ALT/AST               | 1 (3.3)     | 4 (13.3)    | 0           | 0           |
| Peripheral neuropathy | 0           | 2 (6.7)     | 1 (3.3)     | 0           |
| Hemorrhagic cystitis  | 0           | 2 (6.7)     | 0           | 0           |
| Renal                 | 1 (3.3)     | 3 (10.0)    | 0           | 0           |

ALT, alanine aminotransferase; AST, aspartate aminotransferase.

patients was 7.7 months. To evaluate the effect of disease controlled by IE on OS, survival analysis, using the log-rank test, was performed among patients grouped as the disease-control group (*n* = 14) and disease-progression group (*n* = 16). Significantly improved survival was demonstrated in the disease-control group (Fig. 2). The median survival periods of the disease-control and disease-progression groups were 10.7 months and 3.6 months (*P* < 0.001), respectively.

Univariate analysis for survival was conducted using the following variables: age; sex; ECOG PS; site of the primary tumor; the presence of distant metastasis; exposure to alcohol drinking, betel quid (BQ) chewing or smoking; tumor-cell differentiation and response to chemotherapy (Table 4). Exposure to cigarette smoking or BQ chewing was associated with poor survival. In contrast, patients with fair PS (ECOG = 0) or who showed a response to IE

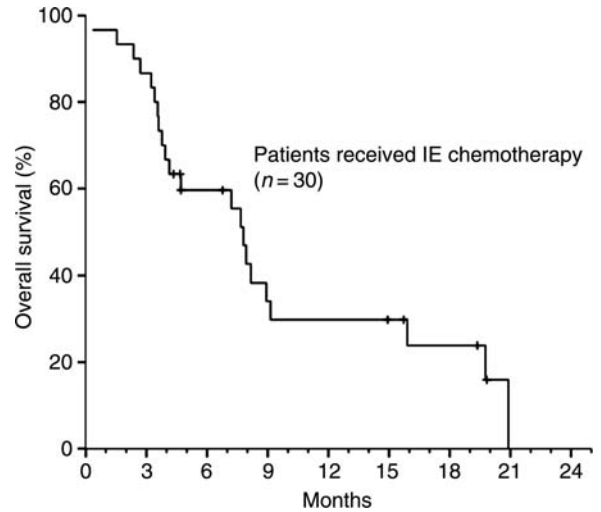

**Figure 1.** Kaplan–Meier estimates of overall survival (OS).

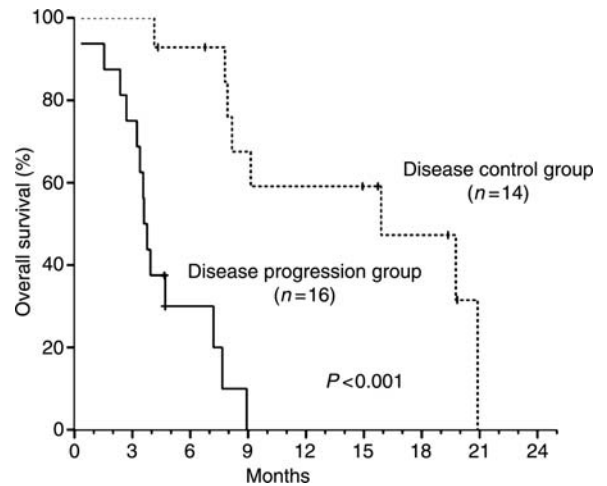

**Figure 2.** Kaplan–Meier estimates of OS according to the treatment response.

chemotherapy had a significantly better outcome. Variables with *P* value < 0.1 in univariate analysis were entered into the multivariate models. In multivariate analyses, disease control status under IE chemotherapy remained significantly associated with longer OS. BQ chewing and poor PS (ECOG 1–2) were associated with poor prognosis.

**DISCUSSION**

This study demonstrated that chemotherapy with IE had modest activity against cisplatin-refractory R/M SCCHN. Our data showed rates of response and control of disease of 27 and 47%, respectively. The combination therapy appeared to be useful for cisplatin-refractory R/M SCCHN patients, especially those who could not receive the newer generation of targeted therapies discussed below. In this study, treatment-related toxicities were modest and manageable. The major toxicities were myelosuppression, including leucopenia



**Table 4.** Prognostic factors for overall survival (OS), according to univariate and multivariate analyses

| Variable                                     | Univariate analysis |            |         | Multivariate analysis |            |         |
|----------------------------------------------|---------------------|------------|---------|-----------------------|------------|---------|
|                                              | HR                  | 95% CI     | P value | HR                    | 95% CI     | P value |
| Age                                          |                     |            |         |                       |            |         |
| >60 year                                     | 1.77                | 0.64–4.88  | 0.272   | –                     | –          | –       |
| ≤60 year                                     | 1                   |            |         |                       |            |         |
| Men                                          | 1.99                | 0.45–8.73  | 0.361   | –                     | –          | –       |
| Women                                        | 1                   |            |         |                       |            |         |
| ECOG                                         |                     |            |         |                       |            |         |
| PS = 1–2                                     | 3.46                | 1.24–9.64  | 0.018   | 4.35                  | 1.27–14.86 | 0.019   |
| 0                                            | 1                   |            |         | 1                     |            |         |
| Metastatic                                   | 0.60                | 0.24–1.51  | 0.280   | –                     | –          | –       |
| Locoregional only                            | 1                   |            |         |                       |            |         |
| Site                                         |                     |            |         |                       |            |         |
| Nasopharynx                                  | 1.39                | 0.56–3.47  | 0.481   | –                     | –          | –       |
| Oropharynx                                   | 1                   |            |         |                       |            |         |
| Poorly to undifferentiated histology*        | 0.996               | 0.33–3.00  | 0.994   | –                     | –          | –       |
| Well to moderately differentiated histology* | 1                   |            |         |                       |            |         |
| Previous surgery                             | 1.26                | 0.53–2.99  | 0.594   | –                     | –          | –       |
| Smoking                                      | 3.33                | 1.07–10.39 | 0.039   | 1.26                  | 0.22–7.16  | 0.796   |
| BQ chewing                                   | 2.65                | 1.09–6.45  | 0.032   | 3.83                  | 1.25–11.74 | 0.019   |
| Alcohol                                      | 2.26                | 0.91–5.64  | 0.080   | –                     | –          | –       |
| Response to chemotherapy                     |                     |            |         |                       |            |         |
| Disease control                              | 0.10                | 0.03–0.32  | <0.001  | 0.06                  | 0.01–0.25  | <0.001  |
| Not disease control                          | 1                   |            |         |                       |            |         |

HR, hazard ratio; CI, confidence interval.

\*According to American Joint Committee on Cancer (AJCC) Cancer Staging Manual Sixth Edition (2002).

(56.7%), neutropenia (43.3%) and anemia (16.7%). The incidence of febrile neutropenia was modest (16.7%). Grade 3 or 4 thrombocytopenia occurred in only 10% of patients. Other non-hematologic toxicities were also tolerable.

Patients with R/M SCCHN generally have a poor prognosis. Cisplatin-based chemotherapy is the most widely accepted chemotherapy regimen, with a response rate of 20–68% in the published literature (14–16). The outcome of cisplatin-refractory disease is dismal, with 2–3 months of median survival in previous retrospective reports (17). Some patients with R/M SCCHN still have good PS at the time of cisplatin failure and are candidates for second-line chemotherapy. However, there is no standard second-line therapy for cisplatin-refractory R/M SCCHN currently. New-generation chemotherapy such as taxane- and

vinorelbine-based regimens had been studied in patients with platinum-refractory R/M disease (18,19). These agents are associated with response rates in the region of 20% and response durations of 5 months. Recently, the EGFR antagonist cetuximab has demonstrated a survival advantage in the setting of metastatic disease (5) Vermorken *et al.* (20) analyzed three previous trials of cetuximab efficacy against disease progression during platinum therapy. Cetuximab, (either as monotherapy or in combination with other agents), led to a response rate of 10–13%, a disease control rate of 46–56% and a median OS of 5.2–6.1 months in cisplatin-refractory R/M SCCHN (6,7,21). However, cetuximab use is limited without drug reimbursement for R/M SCCHN in Taiwan.

Several factors have been identified as predictive of better survival in patients with R/M SCCHN who are most likely benefit from treatment. They included adequate PS, a long-time interval between primary disease and recurrence, response to palliative chemotherapy and poorly differentiated histology (3,4). Unfavorable factors include weight loss and previous radiation therapy. Similarly, an analysis of two ECOG randomized trials showed that some R/M SCCHN patients may benefit from first-line cisplatin-based chemotherapy. They were more likely to have achieved an objective response to chemotherapy, have poor tumor-cell differentiation, be white, have an ECOG PS of 0 and have received no previous radiotherapy (1).

In our study, treatment response was correlated with the absence of a history of previous cigarette smoking. This finding is consistent with those of previous reports showing that tobacco use could influence the response of tumors to treatment. Further studies focusing on predictors of treatment response in cisplatin-refractory SCCHN are needed to identify the group of patients who would benefit most from second-line chemotherapy. In the univariate survival analysis, our study showed that ECOG PS 1–2 was associated with poor survival when compared with ECOG PS 0. In contrast, patients whose disease was controlled with IE chemotherapy also had better outcomes. History of cigarette smoking or BQ chewing led to a decreased OS. In the multivariate analysis of OS, disease control and good PS were still significantly associated with better prognosis after adjusting for other prognostic factors. Previous exposure to BQ chewing led to a short OS. The detrimental effect of cigarette smoking on survival was not seen in the multivariate analysis, possibly because of other confounders, including BQ chewing and response to palliative chemotherapy. BQ chewing, tobacco and alcohol have been documented as risk factors for head and neck cancer. BQ chewing is rare in the USA, Japan and Europe. On the other hand, there is an estimated 600 million people chewing betel nut worldwide, most in Southeast Asia (including Taiwan) and India. It plays an important role in carcinogenesis of squamous cell carcinoma of buccal mucosa in the above areas (22,23). Previous studies showed that BQ chewing before treatment was associated with poor survival in oral SCCHN (22,23).

Several possible mechanisms for this effect of BQ chewing were identified. The expression of p53 and p21<sup>ras</sup> was often higher in oral SCCHN and precancerous lesions from BQ chewers (24,25). Furthermore, safrole-like DNA adducts were frequently observed in oral squamous cell carcinoma and matched non-cancerous tissues after BQ chewing (26). Recently, overexpression of EGFR was identified in BQ-associated SCCHN. The overexpression of EGFR in SCCHN was associated with reduced recurrence-free or OS (27,28).

The limitation of our study is derived the small sample size. Although our findings are preliminary, it seems that there is a small group of these patients with cisplatin-refractory R/M SCCHN that may benefit from further treatment. Previous studies have demonstrated that single-agent chemotherapy such as docetaxel, gefitinib and cetuximab provide moderate response for R/M SCCHN patients (2). However, these drugs are not reimbursed currently for R/M SCCHN in Taiwan. We used the non-taxane containing, non-targeted therapy, which is an economic choice with acceptable toxicity and comparable efficacy in the recurrent/metastatic SCCHN. The findings of durable disease control, and the possible identification of a prognostic/predictive clinical parameter, should warrant further study of this regimen.

Therefore, we suggest that IE might be an alternative choice to taxane and target therapy in cisplatin-resistant SCCHN.

In conclusion, a regimen combining IE appeared to produce a modest activity and acceptable toxicities in patients with cisplatin-refractory R/M SCCHN. Further prospective investigation of this regimen is warranted.

### Conflict of interest statement

None declared.

### Funding

A grant from Department of Health, Center of Excellence for Cancer Research at Taipei Veterans General Hospital (DOH99-TD-C-111-007) (M.H.Y.) and a grant from Taiwan Clinical Oncology Research Foundation.

### References

- Argiris A, Li Y, Forastiere A. Prognostic factors and long-term survivorship in patients with recurrent or metastatic carcinoma of the head and neck. *Cancer* 2004;101:2222–9.
- Colevas AD. Chemotherapy options for patients with metastatic or recurrent squamous cell carcinoma of the head and neck. *J Clin Oncol* 2006;24:2644–52.
- Forastiere AA, Metch B, Schuller DE, Ensley JF, Hutchins LF, Triozzi P, et al. Randomized comparison of cisplatin plus fluorouracil and carboplatin plus fluorouracil versus methotrexate in advanced squamous-cell carcinoma of the head and neck: a Southwest Oncology Group study. *J Clin Oncol* 1992;10:1245–51.
- Jacobs C, Lyman G, Velez-Garcia E, Sridhar KS, Knight W, Hochster H, et al. A phase III randomized study comparing cisplatin and fluorouracil as single agents and in combination for advanced squamous cell carcinoma of the head and neck. *J Clin Oncol* 1992;10:257–63.
- Vermorken JB, Mesia R, Rivera F, Remenar E, Kawecki A, Rottey S, et al. Platinum-based chemotherapy plus cetuximab in head and neck cancer. *N Engl J Med* 2008;359:1116–27.
- Baselga J, Trigo JM, Bourhis J, Tortochaux J, Cortes-Funes H, Hitt R, et al. Phase II multicenter study of the antiepidermal growth factor receptor monoclonal antibody cetuximab in combination with platinum-based chemotherapy in patients with platinum-refractory metastatic and/or recurrent squamous cell carcinoma of the head and neck. *J Clin Oncol* 2005;23:5568–77.
- Herbst RS, Arquette M, Shin DM, Dicke K, Vokes EE, Azarnia N, et al. Phase II multicenter study of the epidermal growth factor receptor antibody cetuximab and cisplatin for recurrent and refractory squamous cell carcinoma of the head and neck. *J Clin Oncol* 2005;23:5578–87.
- Airoldi M, Cortesina G, Giordano C, Pedani F, Bumma C. Ifosfamide in the treatment of head and neck cancer. *Oncology* 2003;65(Suppl 2):37–43.
- Gedlicka C, Kornfehl J, Turhani D, Burian M, Formanek M. Salvage therapy with oral etoposide in recurrent and/or metastatic squamous cell carcinoma of the head and neck. *Cancer Invest* 2006;24:252–5.
- Kohno N, Kitahara S, Kawaida M, Ohmuma T. Prognosis after salvage chemotherapy for locally unresectable recurrent squamous cell carcinoma of the head and neck. *Jpn J Clin Oncol* 1999;29:462–6.
- Trope C, Kearn J, Vergote I, Vossli S. A phase II study of etoposide combined with ifosfamide as second-line therapy in cisplatin-resistant ovarian carcinomas. *Cancer Chemother Pharmacol* 1990;26:S45–7.
- Aravantinos G, Dimopoulos MA, Kosmidis P, Bafaloukos D, Papadimitriou C, Kiamouris C, et al. Ifosfamide plus oral etoposide salvage chemotherapy for platinum-resistant paclitaxel-pretreated ovarian cancer. *Ann Oncol* 2000;11:607–12.
- Grier HE, Krailo MD, Tarbell NJ, Link MP, Fryer CJ, Pritchard DJ, et al. Addition of ifosfamide and etoposide to standard chemotherapy for Ewing's sarcoma and primitive neuroectodermal tumor of bone. *N Engl J Med* 2003;348:694–701.
- Forastiere AA, Leong T, Rowinsky E, Murphy BA, Vlock DR, DeConti RC, et al. Phase III comparison of high-dose paclitaxel + cisplatin + granulocyte colony-stimulating factor versus low-dose paclitaxel + cisplatin in advanced head and neck cancer: Eastern Cooperative Oncology Group Study E1393. *J Clin Oncol* 2001;19:1088–95.
- Hitt R, Jimeno A, Rodriguez-Pinilla M, Rodriguez-Peralto JL, Millan JM, Lopez-Martin A, et al. Phase II trial of cisplatin and capecitabine in patients with squamous cell carcinoma of the head and neck, and correlative study of angiogenic factors. *Br J Cancer* 2004;91:2005–11.
- Glisson BS, Murphy BA, Frenette G, Khuri FR, Forastiere AA. Phase II Trial of docetaxel and cisplatin combination chemotherapy in patients with squamous cell carcinoma of the head and neck. *J Clin Oncol* 2002;20:1593–9.
- Leon X, Hitt R, Constenla M, Rocca A, Stupp R, Kovacs AF, et al. A retrospective analysis of the outcome of patients with recurrent and/or metastatic squamous cell carcinoma of the head and neck refractory to a platinum-based chemotherapy. *Clin Oncol (R Coll Radiol)* 2005;17:418–24.
- Numico G, Merlano M. Second-line treatment with docetaxel after failure of a platinum-based chemotherapy in squamous-cell head and neck cancer. *Ann Oncol* 2002;13:331–3.
- Iop A, Carlei G, Isaia A. Vinorelbine, bleomycin and methotrexate as a salvage therapy for patients with head and neck squamous carcinoma in relapse after cisplatin/fluorouracil. *Ann Oncol* 1998;9:225–7.
- Vermorken JB, Herbst RS, Leon X, Amell N, Baselga J. Overview of the efficacy of cetuximab in recurrent and/or metastatic squamous cell carcinoma of the head and neck in patients who previously failed platinum-based therapies. *Cancer* 2008;112:2710–9.
- Vermorken JB, Trigo J, Hitt R, Koralewski P, az-Rubio E, Rolland F, et al. Open-label, uncontrolled, multicenter phase II study to evaluate the efficacy and toxicity of cetuximab as a single agent in patients with

- recurrent and/or metastatic squamous cell carcinoma of the head and neck who failed to respond to platinum-based therapy. *J Clin Oncol* 2007;25:2171–7.
22. Lo WL, Kao SY, Chi LY, Wong YK, Chang RC. Outcomes of oral squamous cell carcinoma in Taiwan after surgical therapy: factors affecting survival. *J Oral Maxillofac Surg* 2003;61:751–8.
  23. Lee JJ, Jeng JH, Wang HM, Chang HH, Chiang CP, Kuo YS, et al. Univariate and multivariate analysis of prognostic significance of betel quid chewing in squamous cell carcinoma of buccal mucosa in Taiwan. *J Surg Oncol* 2005;91:41–7.
  24. Kuo MY, Chang HH, Hahn LJ, Wang JT, Chiang CP. Elevated ras p21 expression in oral premalignant lesions and squamous cell carcinoma in Taiwan. *J Oral Pathol Med* 1995;24:255–60.
  25. Hsieh LL, Wang PF, Chen IH, Liao CT, Wang HM, Chen MC, et al. Characteristics of mutations in the p53 gene in oral squamous cell carcinoma associated with betel quid chewing and cigarette smoking in Taiwanese. *Carcinogenesis* 2001;22:1497–503.
  26. Chen CL, Chi CW, Chang KW, Liu TY. Safrrole-like DNA adducts in oral tissue from oral cancer patients with a betel quid chewing history. *Carcinogenesis* 1999;20:2331–4.
  27. Chen IH, Chang JT, Liao CT, Wang HM, Hsieh LL, Cheng AJ. Prognostic significance of EGFR and Her-2 in oral cavity cancer in betel quid prevalent area cancer prognosis. *Br J Cancer* 2003;89:681–6.
  28. Nicholson RI, Gee JM, Harper ME. EGFR and cancer prognosis. *Eur J Cancer* 2001;37(Suppl 4):S9–15.
